# Supplementary material for: A multidimensional biosensor system to guide LUAD individualized treatment
Source: Royal Society of Chemistry journal article supplement (doi:10.1039/d1tb00731a), 2021-01-01
Supplement: d1tb00731a1.pdf [file d1tb00731a1.pdf]

Table S1. Clinical information of two NSCLC patients

| Patient | Gender | Age | Smoking | Stage  | Type           |
|---------|--------|-----|---------|--------|----------------|
| No.1    | Male   | 71  | None    | T2N1M0 | Adenocarcinoma |
| No.2    | Male   | 67  | Yes     | T1N1M0 | Adenocarcinoma |

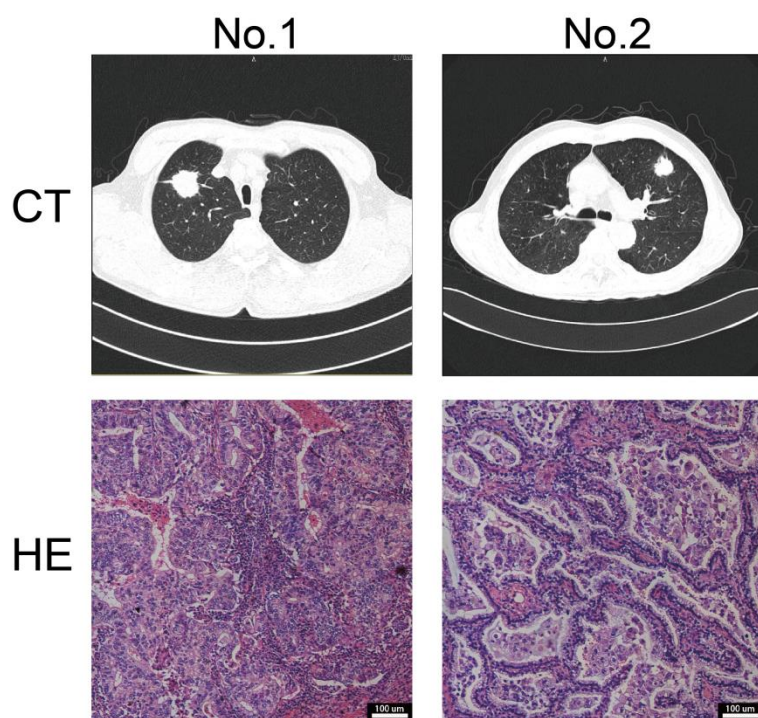

Figure S1. Abdominal CT of two patients and haematoxylin&eosin staining sections of two adenocarcinoma tissue.
